# Supplementary material for: A novel non-canonical mechanism of regulation of MST3 (mammalian Sterile20-related kinase 3)
Source: PubMed Central journal article supplement — Biochem J. 2012 Feb 24;442(Pt 3):595–610. doi: 10.1042/BJ20112000 (PMC3286863; doi:10.1042/bj20112000), 2012-02-24
Supplement: bj4420595add.pdf [file bj4420595add.pdf]

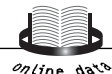

SUPPLEMENTARY ONLINE DATA

A novel non-canonical mechanism of regulation of MST3 (mammalian Sterile20-related kinase 3)

Stephen J. FULLER\*, Liam J. McGUFFIN\*, Andrew K. MARSHALL\*, Alejandro GIRALDO\*, Sampsa PIKKARAINEN†, Angela CLERK\* and Peter H. SUGDEN\*<sup>1</sup>

\*School of Biological Sciences and Institute for Cardiovascular and Metabolic Research, University of Reading, Whiteknights Campus, Philip Lyle Building, Reading RG6 6BX, U.K., and †Department of Internal Medicine, Institute of Clinical Medicine, Helsinki University Central Hospital, Stenbäckinkatu 9, FIN-00290 Helsinki, Finland

```

NP_001027467.2    MAHSPVQSGPLGMQ-----NLKADPEELFTKLEKIGKGS
NP_003567.2      -----MDSRAQLWGLALNKRRLTLPHPGGSTNLKADPEELFTKLEKIGKGS
Rat MST3         MAHSPVQSGPLGMQ-----TLKADPEELFTKLEKIGKGS
NP_663440.1      MAHSPVQSGPLGMQ-----NLKADPEELFTKLEKIGKGS
                  .*****

NP_001027467.2    FGEVFKGIDNRTQKVVAIKIIDLEEAEDIEDIQQEITVLSQCDSPYVTKYGSYLKDTK
NP_003567.2      FGEVFKGIDNRTQKVVAIKIIDLEEAEDIEDIQQEITVLSQCDSPYVTKYGSYLKDTK
Rat MST3         FGEVFKGIDNRTQKVVAIKIIDLEEAEDIEDIQQEITVLSQCDSPYVTKYGSYLKDTK
NP_663440.1      FGEVFKGIDNRTQKVVAIKIIDLEEAEDIEDIQQEITVLSQCDSPYVTKYGSYLKDTK
                  *****

NP_001027467.2    LWIIMEYLGGSALDLEPGPLDETQIATILREILKGLDYLHSEKKIHRDIIKAANVLLSE
NP_003567.2      LWIIMEYLGGSALDLEPGPLDETQIATILREILKGLDYLHSEKKIHRDIIKAANVLLSE
Rat MST3         LWIIMEYLGGSALDLEPGPLDEIQIATILREILKGLDYLHSEKKIHRDIIKAANVLLSE
NP_663440.1      LWIIMEYLGGSALDLEPGPLDEIQIATILREILKGLDYLHSEKKIHRDIIKAANVLLSE
                  *****

NP_001027467.2    HGEVKLADFGVAGQLTDTQIKRNTFVGTFFWMAPEVIKQSAYDSKADIWSLGITAIELAR
NP_003567.2      HGEVKLADFGVAGQLTDTQIKRNTFVGTFFWMAPEVIKQSAYDSKADIWSLGITAIELAR
Rat MST3         HGEVKLADFGVAGQLTDTQIKRNTFVGTFFWMAPEVIKQSAYDSKADIWSLGITAIELAK
NP_663440.1      HGEVKLADFGVAGQLTDTQIKRNTFVGTFFWMAPEVIKQSAYDSKADIWSLGITAIELAK
                  *****

NP_001027467.2    GEPHSELHPMKVLFILPKNNPPTLEGNSKPLKEFVEACLNKEPSFRPTAKELLKHKFI
NP_003567.2      GEPHSELHPMKVLFILPKNNPPTLEGNSKPLKEFVEACLNKEPSFRPTAKELLKHKFI
Rat MST3         GEPHSELHPMKVLFILPKNNPPTLEGSYSRPLKEFVEACLNKEPSFRPTAKELLKHKFI
NP_663440.1      GEPHSELHPMKVLFILPKNNPPTLEGNSKPLKEFVEACLNKEPSFRPTAKELLKHKFI
                  *****

NP_001027467.2    LRNAKKTSYLTELIDRYKRWKAEQSHDSSSEDSDAETDQGASGGSDSGDWIFTIREKDP
NP_003567.2      LRNAKKTSYLTELIDRYKRWKAEQSHDSSSEDSDAETDQGASGGSDSGDWIFTIREKDP
Rat MST3         IRNAKKTSYLTELIDRYKRWKAEQSHEDSSSEDSVETDQSAGGSDSGDWIFTIREKDP
NP_663440.1      IRNAKKTSYLTELIDRYKRWKAEQSHEDSSSEDSVETDQGASGGSDSGDWIFTIREKDP
                  *****

NP_001027467.2    KNLENGALQPSDLDRNKMMDIPKRPFSQCLSTIISPLFAELKEKSQACGGNLSIEELRG
NP_003567.2      KNLENGALQPSDLDRNKMMDIPKRPFSQCLSTIISPLFAELKEKSQACGGNLSIEELRG
Rat MST3         KNLENGTLPQSDLERNKMMDIPKRPFSQCLSTIISPLFAELKEKSQACGGNLSIEELRG
NP_663440.1      KNLENGTLPQSDLERNKMMDIPKRPFSQCLSTIISPLFAELKEKSQACGGNLSIEELRG
                  *****

NP_001027467.2    AIYLAEACPGISDTMVAQLVQRLQRYSLSGGGTSSH 431
NP_003567.2      AIYLAEACPGISDTMVAQLVQRLQRYSLSGGGTSSH 443
Rat MST3         AIYLAEACPGISDTMVAQLVQRLQRYSLSGGASAH 431
NP_663440.1      AIYLAEACPGISDTMVAQLVQRLQRYSLSGGASAH 431
                  *****
    
```

Figure S1 MST3 alignments in *H. sapiens*, mouse and rat

GenBank® accession numbers are NP\_001027467.2 for *H. sapiens* 431 residue MST3 [note that this is shown as shown as MST3b on the NCBI database (<http://www.ncbi.nlm.nih.gov/protein/>)], NP\_003567.2 for *H. sapiens* 443 residue MST3b (shown as MST3a on the NCBI database) and NP\_663440.1 (431 residues) for mouse. The rat sequence was derived from our cDNA sequence, EU371958.1, but now also see NP\_001120966.1 (431 residue MST3), deposited on 14-09-2011. ClustalW2 (<http://www.ebi.ac.uk/Tools/msa/clustalw2/>) was used to align the sequences. As implied, the attributions in the NCBI database are confused. The earliest reference associated with the 443 residue NP\_003567.2 entry [1] in fact refers to the 431 residue protein, whereas the earliest references associated with the NP\_001120966.1 entry refer to both the 431 residue [1] and the 443 residue [2] proteins.

<sup>1</sup> To whom correspondence should be addressed (email p.sugden@reading.ac.uk).

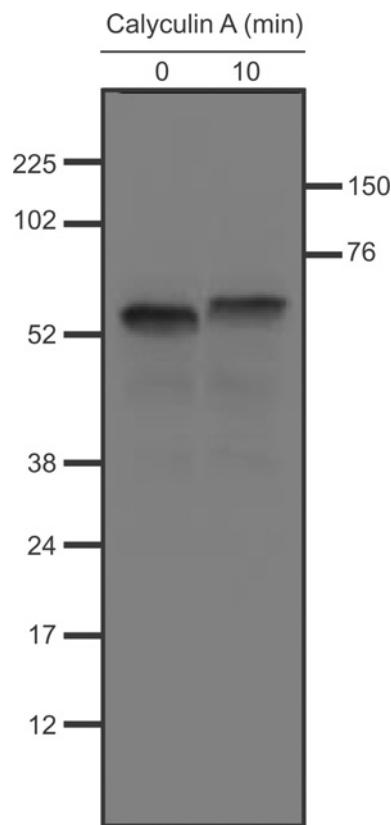

**Figure S2 Exposure of myocytes to calyculin A results in the appearance of only a single 58 kDa FLAG–MST3 band**

Myocytes were infected with AdV–FLAG–MST3(FL). They were either not stimulated or were exposed to calyculin A (100 nM for 10 min), and extracts were prepared. Proteins were separated by SDS/PAGE followed by immunoblot analysis with anti-FLAG antibodies. The numbers on the sides of the immunoblot signify the positions of the molecular-mass markers in kDa.

## REFERENCES

- 1 Schinkmann, K. and Blenis, J. (1997) Cloning and characterization of a human STE20-like protein kinase with unusual cofactor requirements. *J. Biol. Chem.* **272**, 28695–28703
- 2 Zhou, T.-H., Ling, K., Guo, J., Zhou, H., Wu, Y.-L., Jing, Q., Ma, L. and Pei, G. (2000) Identification of a human brain-specific isoform of mammalian STE20-like kinase 3 that is regulated by cAMP-dependent protein kinase. *J. Biol. Chem.* **275**, 2513–2519

Received 15 November 2011/4 January 2012; accepted 9 January 2012  
Published as BJ Immediate Publication 9 January 2012, doi:10.1042/BJ20112000

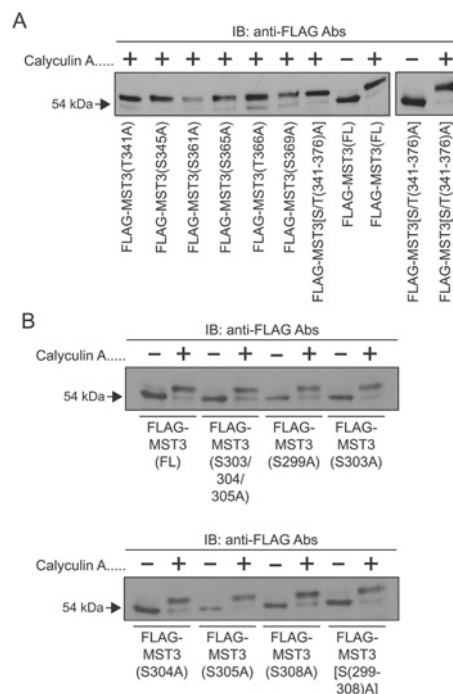

**Figure S3 Alanine scanning of the FLAG–MST3(341–376) and FLAG–MST3(299–308) regions**

Myocytes were infected with the appropriate AdV vectors. They were either unstimulated or were exposed to calyculin A (100 nM for 10 min), and extracts were prepared. Proteins were separated by SDS/PAGE followed by immunoblot (IB) analysis with anti-FLAG antibodies. Immunoblots are representative of experiments repeated at least twice with different myocyte preparations. Calyculin A-induced reductions in FLAG–MST3(FL) are shown for comparison. **(A)** Individual (left-hand panel) mutation of each of the six serine/threonine residues in the FLAG–MST3(341–376) region or combined mutation of all six serine/threonine residues (right-hand panel) did not affect the ability of calyculin A to reduce the mobility of FLAG–MST3. **(B)** Individual mutation of each of the five serine residues in the FLAG–MST3(299–308) region or combined mutation of FLAG–MST3(S303/304/305) and FLAG–MST3(S299/303/304/305/308) did not affect the ability of calyculin A to reduce the mobility of FLAG–MST3.
